# Supplementary material for: Systemic Capillary Leak Syndrome (Clarkson Syndrome) in Cancer Patients: A Systematic Review
Source: PubMed Central journal article supplement (PMC6262589; doi:10.3390/jcm7110418), 2018-11-06

**Supplementary Table S1.** Checklist summarizing compliance with PRISMA guidelines.

| Section/topic             | #  | Checklist item                                                                                                                                                                                                                                                                                              | Reported on page # |
|---------------------------|----|-------------------------------------------------------------------------------------------------------------------------------------------------------------------------------------------------------------------------------------------------------------------------------------------------------------|--------------------|
| <b>TITLE</b>              |    |                                                                                                                                                                                                                                                                                                             |                    |
| Title                     | 1  | Identify the report as a systematic review, meta-analysis, or both.                                                                                                                                                                                                                                         | 1                  |
| <b>ABSTRACT</b>           |    |                                                                                                                                                                                                                                                                                                             |                    |
| Structured summary        | 2  | Provide a structured summary including, as applicable: background; objectives; data sources; study eligibility criteria, participants, and interventions; study appraisal and synthesis methods; results; limitations; conclusions and implications of key findings; systematic review registration number. | 2                  |
| <b>INTRODUCTION</b>       |    |                                                                                                                                                                                                                                                                                                             |                    |
| Rationale                 | 3  | Describe the rationale for the review in the context of what is already known.                                                                                                                                                                                                                              | 4-5                |
| Objectives                | 4  | Provide an explicit statement of questions being addressed with reference to participants, interventions, comparisons, outcomes, and study design (PICOS).                                                                                                                                                  | 4-5                |
| <b>METHODS</b>            |    |                                                                                                                                                                                                                                                                                                             |                    |
| Protocol and registration | 5  | Indicate if a review protocol exists, if and where it can be accessed (e.g., Web address), and, if available, provide registration information including registration number.                                                                                                                               | N/A                |
| Eligibility criteria      | 6  | Specify study characteristics (e.g., PICOS, length of follow-up) and report characteristics (e.g., years considered, language, publication status) used as criteria for eligibility, giving rationale.                                                                                                      | 5-6                |
| Information sources       | 7  | Describe all information sources (e.g., databases with dates of coverage, contact with study authors to identify additional studies) in the search and date last searched.                                                                                                                                  | 5-6                |
| Search                    | 8  | Present full electronic search strategy for at least one database, including any limits used, such that it could be repeated.                                                                                                                                                                               | 5-6                |
| Study selection           | 9  | State the process for selecting studies (i.e., screening, eligibility, included in systematic review, and, if applicable, included in the meta-analysis).                                                                                                                                                   | 5-6                |
| Data collection process   | 10 | Describe method of data extraction from reports (e.g., piloted forms, independently, in duplicate) and any processes for obtaining and confirming data from investigators.                                                                                                                                  | 5-6                |

|                                    |    |                                                                                                                                                                                                                        |     |
|------------------------------------|----|------------------------------------------------------------------------------------------------------------------------------------------------------------------------------------------------------------------------|-----|
| Data items                         | 11 | List and define all variables for which data were sought (e.g., PICOS, funding sources) and any assumptions and simplifications made.                                                                                  | 5-6 |
| Risk of bias in individual studies | 12 | Describe methods used for assessing risk of bias of individual studies (including specification of whether this was done at the study or outcome level), and how this information is to be used in any data synthesis. | N/A |
| Summary measures                   | 13 | State the principal summary measures (e.g., risk ratio, difference in means).                                                                                                                                          | 5-6 |
| Synthesis of results               | 14 | Describe the methods of handling data and combining results of studies, if done, including measures of consistency (e.g., $I^2$ ) for each meta-analysis.                                                              | 5-6 |

| Section/topic                 | #  | Checklist item                                                                                                                                                                                           | Reported on page #   |
|-------------------------------|----|----------------------------------------------------------------------------------------------------------------------------------------------------------------------------------------------------------|----------------------|
| Risk of bias across studies   | 15 | Specify any assessment of risk of bias that may affect the cumulative evidence (e.g., publication bias, selective reporting within studies).                                                             | N/A                  |
| Additional analyses           | 16 | Describe methods of additional analyses (e.g., sensitivity or subgroup analyses, meta-regression), if done, indicating which were pre-specified.                                                         | N/A                  |
| <b>RESULTS</b>                |    |                                                                                                                                                                                                          |                      |
| Study selection               | 17 | Give numbers of studies screened, assessed for eligibility, and included in the review, with reasons for exclusions at each stage, ideally with a flow diagram.                                          | 7-8                  |
| Study characteristics         | 18 | For each study, present characteristics for which data were extracted (e.g., study size, PICOS, follow-up period) and provide the citations.                                                             | Supplementary tables |
| Risk of bias within studies   | 19 | Present data on risk of bias of each study and, if available, any outcome level assessment (see item 12).                                                                                                | N/A                  |
| Results of individual studies | 20 | For all outcomes considered (benefits or harms), present, for each study: (a) simple summary data for each intervention group (b) effect estimates and confidence intervals, ideally with a forest plot. | Supplementary tables |
| Synthesis of results          | 21 | Present results of each meta-analysis done, including confidence intervals and measures of consistency.                                                                                                  | N/A                  |
| Risk of bias across studies   | 22 | Present results of any assessment of risk of bias across studies (see Item 15).                                                                                                                          | N/A                  |
| Additional analysis           | 23 | Give results of additional analyses, if done (e.g., sensitivity or subgroup analyses, meta-regression [see Item 16]).                                                                                    | N/A                  |
| <b>DISCUSSION</b>             |    |                                                                                                                                                                                                          |                      |

|                     |    |                                                                                                                                                                                      |    |
|---------------------|----|--------------------------------------------------------------------------------------------------------------------------------------------------------------------------------------|----|
| Summary of evidence | 24 | Summarize the main findings including the strength of evidence for each main outcome; consider their relevance to key groups (e.g., healthcare providers, users, and policy makers). | 11 |
| Limitations         | 25 | Discuss limitations at study and outcome level (e.g., risk of bias), and at review-level (e.g., incomplete retrieval of identified research, reporting bias).                        | 11 |
| Conclusions         | 26 | Provide a general interpretation of the results in the context of other evidence, and implications for future research.                                                              | 11 |
| <b>FUNDING</b>      |    |                                                                                                                                                                                      |    |
| Funding             | 27 | Describe sources of funding for the systematic review and other support (e.g., supply of data); role of funders for the systematic review.                                           | 12 |

*From:* Moher D, Liberati A, Tetzlaff J, Altman DG, The PRISMA Group (2009). Preferred Reporting Items for Systematic Reviews and Meta-Analyses: The PRISMA Statement. PLoS Med 6(6): e1000097. doi:10.1371/journal.pmed1000097

**Supplementary Table S2. Summary profiles of cancer patients with systemic capillary leak syndrome**

| Ref. No. | Author, year                  | Age/ Sex | Presenting symptoms                                                                                         | Etiology of SCLS                   | Cancer diagnosis                                        | Blood pressure (mmHg) | Albumin (g/dL) | Treatment                                                                                        | Outcome         | Cause of Death |
|----------|-------------------------------|----------|-------------------------------------------------------------------------------------------------------------|------------------------------------|---------------------------------------------------------|-----------------------|----------------|--------------------------------------------------------------------------------------------------|-----------------|----------------|
| 1        | Pothen, et al., 2014          | 75/F     | Hypotension, leg edema, anasarca, renal failure, hypoalbuminemia                                            | Cancer                             | Diffuse large B-cell lymphoma                           | 90/60                 | 2.9            | Theophylline treatment (200 mg/day)                                                              | Alive           | -              |
| 2        | Casadei Gardini, et al., 2013 | 65/F     | Pulmonary hypertension                                                                                      | Drug (gemcitabine, nab-paclitaxel) | Ductal carcinoma (pT3 N0 M0, stage IIa), ovarian cancer | -                     | 0.6            | High-dose diuretics (furosemide 250 mg daily) combined with cortisone (40 mg methylprednisolone) | Alive (Relapse) | -              |
| 3        | Zhang, et al., 2013           | 59/F     | Generalized edema, severe hypotension                                                                       | Drug (trastuzumab)                 | Invasive carcinoma of the breast                        | -                     | 3              | Radiosone, diuretics, continuous thoracocentesis & pericardiocentesis                            | Alive           | -              |
| 4        | Lourdes et al., 2012          | 71/F     | Lower extremity and facial swelling, nausea, vomiting, diarrhea                                             | Cancer                             | ALK-negative anaplastic large cell lymphoma             | 70/-                  | 3              | Methylprednisolone 90 mg twice daily                                                             | Died            | Cancer relapse |
| 5        | Ahn et al., 2012              | 50/F     | Fever, progressive abdominal distention, nausea, bilious emesis, malaise, weakness                          | Cancer                             | Stage IV rectal cancer                                  | 69/17                 | < 1            | Crystalloid, colloid, and vasopressors                                                           | Alive           | -              |
| 6        | Maroz et al., 2012            | 74/M     | Pericardial and pleural effusion, severe edema of the face, abdominal wall, and lower and upper extremities | Drug (pemetrexed therapy)          | Non-small cell lung cancer                              | -                     | 2.0            | Fluid resuscitation, discontinuation of pemetrexed                                               | Alive           | -              |
| 7        | Kai-Feng et al., 2011         | 46/M     | Hypotension, hypoproteinemia                                                                                | Drug (Interleukin-11)              | Hepatic carcinoma                                       | 102/61                | 1.8            | Fluid resuscitation, transfusion, infusion of hydroxyethyl starch and albumin                    | Alive           | -              |
| 7        | Kai-Feng et al., 2011         | 66/M     | Dyspnea with bilateral edema of the hands                                                                   | Drug (Interleukin-11)              | Hepatic carcinoma                                       | 93/59                 | -              | Fluid resuscitation                                                                              | Alive           | -              |
| 8        | Bencsath et                   | 43/F     | Hypotension, unexplained shock                                                                              | Cancer                             | Lobular carcinoma of the breast                         | Hypotens              | -              | Terbutaline and theophylline, albumin                                                            | Alive           | -              |

| Ref. No. | Author, year            | Age/ Sex | Presenting symptoms                                                                           | Etiology of SCLS          | Cancer diagnosis                        | Blood pressure (mmHg) | Albumin (g/dL) | Treatment                                                                               | Outcome        | Cause of Death      |
|----------|-------------------------|----------|-----------------------------------------------------------------------------------------------|---------------------------|-----------------------------------------|-----------------------|----------------|-----------------------------------------------------------------------------------------|----------------|---------------------|
|          | al., 2011               |          |                                                                                               |                           |                                         | ion                   |                | infusion, montelukast                                                                   |                |                     |
| 9        | Umemoto et al., 2011    | 13/M     | High fever, dyspnea, hypoxemia, pulmonary edema                                               | Cancer                    | ALK+ anaplastic large cell lymphoma     | -                     | -              | High dose methylprednisolone                                                            | Alive          | -                   |
| 10       | Krzesiński et al., 2010 | 71/M     | General weakening, decreased exercise tolerance, symmetric crural edema                       | Drug (doxorubicin)        | Myeloma multiplex IgA (stage III)       | 100/80                | 2.9            | Methylprednisolone therapy (Solu-medrol) at high doses (initially 1.5mg/kg /day)        | Alive          | -                   |
| 11       | Hsiao et al., 2010      | 65/F     | Ascites, general anasarca                                                                     | Drug (bortezomib)         | Relapsed multiple myeloma               | -                     | -              | Dexamethasone                                                                           | Died           | Cardiac amyloidosis |
| 12       | Baytan et al., 2010     | 10/F     | Hypotension, periorbital edema, oliguria, dyspnea                                             | Drug (clofarabine)        | Refractory acute lymphoblastic leukemia | 70/50                 | -              | Albumin, immunoglobulin                                                                 | Died (Relapse) | SCLS                |
| 13       | Ingegnoli et al., 2009  | 61/M     | Rapidly progressing shortness of breath, profuse sweating, leg edema, severe fatigue, otalgia | Cancer                    | Nasopharyngeal carcinoma                | -                     | -              | High-dose prednisone (60 mg/day, subsequently gradually tapered), furosemide (25mg/day) | Alive          | -                   |
| 14       | Zhang et al., 2009      | 49/M     | Abdomen distention, hypotension                                                               | Cancer                    | Metastatic liver sarcoma                | 90/60                 | 3              | Hydroxyethyl starch                                                                     | Alive          | -                   |
| 15       | Avarbock et al., 2008   | 53/M     | Dizziness and brief syncope episode, generalized muscle aches, respiratory distress           | Drug (denileukin difitox) | Cutaneous T-cell lymphoma               | -                     | 2.1            | Albumin, vancomycin, cefepime, vasopressors                                             | Died           | SCLS                |
| 16       | Baron et al., 2006      | 55/M     | Generalized edema, dyspnea                                                                    | Cancer                    | Adenocarcinoma of the pancreas          | -                     | 2.0            | Loop diuretics and high-dose IV steroids                                                | Alive          |                     |
| 17       | Deeren et al.,          | 66/F     | Weight gain, urine output decreased,                                                          | Drug (G-CSF)              | Stage IIIB diffuse large B-cell         | 98/45                 | 2.1            | Corticosteroids, dialysis                                                               | Died           | SCLS                |

| Ref. No. | Author, year           | Age/ Sex | Presenting symptoms                                                                                                                      | Etiology of SCLS   | Cancer diagnosis                          | Blood pressure (mmHg) | Albumin (g/dL) | Treatment                                                                                                                   | Outcome   | Cause of Death                  |
|----------|------------------------|----------|------------------------------------------------------------------------------------------------------------------------------------------|--------------------|-------------------------------------------|-----------------------|----------------|-----------------------------------------------------------------------------------------------------------------------------|-----------|---------------------------------|
|          | 2005                   |          | lower limb edema                                                                                                                         |                    | lymphoma                                  |                       |                |                                                                                                                             | (Relapse) |                                 |
| 18       | Biswas et al., 2004    | 58/M     | Dyspnea, generalized edema                                                                                                               | Cancer             | Adenocarcinoma of the pancreatic uncinata | -                     | -              | High-dose diuretic therapy, hydrocortisone 100 mg four times a day                                                          | Alive     | -                               |
| 19       | Pulkkanen et al., 2003 | 50/M     | Mild dyspnea during exercise, pleural effusion                                                                                           | Drug (gemcitabine) | Renal cell carcinoma                      | -                     | 2.2            | IV furosemide and oral prednisolone (starting with 30 mg per day and tapered over the next 4 weeks)                         | Alive     | -                               |
| 20       | Rechner et al., 2003   | 57/M     | Respiratory distress, hypotension, oliguria, edema, fever                                                                                | Drug (G-CSF)       | IgG kappa myeloma                         | +                     | -              | Crystalloid, noradrenaline infusion, prednisolone 500 mg twice daily                                                        | Alive     | -                               |
| 20       | Rechner et al., 2003   | 37/M     | Anuria, edema, hypotension                                                                                                               | Drug (G-CSF)       | Chronic myeloid leukemia                  | -                     | -              | Albumin, methyl prednisolone                                                                                                | Died      | -                               |
| 21       | Vigneau et al., 2002   | 33/M     | Shock with generalized edema, diffuse pain, transient anuria, proteinuria, weight loss, worsening cardiac function, pericardial effusion | Cancer             | Multiple myeloma status post APBSCT       |                       |                | Fluid resuscitation, corticosteroids, theophylline, cyclophosphamide, cyclosporin A, plasma exchanges, naftazone, melphalan | Died      | Cardiac and hepatic amyloidosis |
| 22       | De Pas et al., 2001    | 51/M     | Worsening dyspnea, diffuse swelling, weight gain, hypotension                                                                            | Drug (gemcitabine) | Stage III non-small-cell lung cancer      | +                     | 3.2            | Furosemide, high dose dexamethasone                                                                                         | Alive     | -                               |
| 23       | Meech et al., 2001     | 1/M      | Fever, hepatosplenomegaly, peripheral edema, pleural effusion                                                                            | Cancer             | Anaplastic large cell lymphoma            | -                     | -              | High-dose IVIG, Methylprednisolone, cyclosporin A                                                                           | Alive     | -                               |
| 24       | Dagdemir et al., 2001  | 14/F     | Fever, respiratory distress, hypotension                                                                                                 | Drug (G-CSF)       | Acute non-lymphoblastic leukemia (FAB-M2) | +                     | -              | Methylprednisolone (1mg/kg/d)                                                                                               | Alive     | -                               |

| Ref. No. | Author, year             | Age/ Sex | Presenting symptoms                                                          | Etiology of SCLS          | Cancer diagnosis                             | Blood pressure (mmHg) | Albumin (g/dL) | Treatment                                                      | Outcome         | Cause of Death   |
|----------|--------------------------|----------|------------------------------------------------------------------------------|---------------------------|----------------------------------------------|-----------------------|----------------|----------------------------------------------------------------|-----------------|------------------|
| 25       | Ghosh et al., 2001       | 42/M     | Dyspnea, ascites, weight gain                                                | Cancer                    | Plasma cell leukemia                         | -                     | 3.3            | Aminophylline, terbutaline, furosemide                         | Alive           | -                |
| 26       | Railan et al., 2000      | 80/M     | Generalized erythroderma, chills, ascites, oliguria                          | Drug (denileukin difitox) | Stage IB cutaneous T-cell lymphoma           | -                     | 2.6            | Hydrocortisone                                                 | Alive           | -                |
| 27       | Jillella et al., 2000    | 43/F     | Edema, fever, weight gain, anemia, thrombocytopenia, cervical LN enlargement | Cancer                    | Diffuse large B-cell non-Hodgkin lymphoma    | -                     | 2.4            | -                                                              | Alive           | -                |
| 27       | Jillella et al., 2000    | 32/M     | Generalized edema, fever, pleural effusion, ascites, multiple enlarged LNs   | Cancer                    | Non-Hodgkin lymphoma                         | -                     | 2.0            | -                                                              | Died            | Sepsis -         |
| 28       | Al-Homaidhi et al., 1998 | 39/M     | Weight gain, lower leg edema, fever, ascites, pleural effusion               | Drug (G-CSF)              | Stage II anodular sclerosing Hodgkin disease | -                     | -              | Diuretics, albumin                                             | Died            | Pneumonia        |
| 28       | Al-Homaidhi et al., 1998 | 44/M     | Ascites, pleural effusion, leg swelling                                      | Drug (G-CSF)              | Stage IVB nodular sclerosing Hodgkin disease | -                     | -              | Diuretics, albumin                                             | Died            | SCLS             |
| 29       | Beermann et al., 1998    | 68/M     | Shock with increase in hematocrit, leukocytosis, generalized edema           | Cancer                    | Multiple myeloma                             | -                     | -              | Mephalan, prednisolone                                         | Died            | Multiple myeloma |
| 30       | Takimoto et al., 1998    | 43/M     | Systemic edema, pleural effusion, ascites                                    | Cancer                    | Anaplastic large cell lymphoma               | -                     | WNL            | IV albumin, diuretics, antihistamines, prednisolone (30mg/day) | Alive (Relapse) | -                |
| 31       | Hiraoka et al., 1995     | 67/F     | Edema, oliguria, weight gain                                                 | Cancer                    | Multiple myeloma                             | 122/78                | 3.1            | Albumin, aminophylline                                         | Alive           | -                |
| 32       | Abramov et al., 1995     | 33/F     | Pitting edema, abdominal pain, vomiting, hypotension, tachycardia, oliguria  | Cancer                    | Benign ovarian cystic teratoma               | 80/50                 | 1.6            | -                                                              | Died            | -                |
| 33       | Oeda et al., 1994        | 38/M     | Dyspnea, pleural effusion                                                    | Drug (G-CSF)              | Malignant lymphoma of tonsil                 | -                     | 2.7            | Methylprednisolone pulse                                       | Alive           | -                |

| Ref. No. | Author, year            | Age/ Sex | Presenting symptoms                                                                             | Etiology of SCLS     | Cancer diagnosis                    | Blood pressure (mmHg) | Albumin (g/dL) | Treatment                                             | Outcome | Cause of Death |
|----------|-------------------------|----------|-------------------------------------------------------------------------------------------------|----------------------|-------------------------------------|-----------------------|----------------|-------------------------------------------------------|---------|----------------|
| 33       | Oeda et al., 1994       | 38/M     | Lower leg edema, hypotension, fever                                                             | Drug (G-CSF)         | Malignant lymphoma of cervical cord | +                     | 2.4            | Methylprednisolone pulse                              | Alive   | -              |
| 34       | Dereure et al., 1994    | 66/F     | Cutaneous edema, pericardial effusion, pleural effusion                                         | Cancer               | Sezary syndrome                     | -                     | -              | -                                                     | Died    | Sepsis         |
| 35       | Kao et al., 1993        | 36/M     | Nausea, vomiting, weakness, oliguria, low back discomfort                                       | Cancer               | Pituitary adenoma                   | -                     | -              | Theophylline, prednisone                              | Died    | Cancer         |
| 36       | Ramon et al., 1986      | 49/M     | Epigastric pain, hypertension, paresthesia, tremor, gum hypertrophy, facial edema, skin purpura | Drug (Cyclosporin A) | Sezary syndrome                     | -                     | -              | Cyclosporine discontinuation                          | Alive   | -              |
| 37       | Jeong et al., 2014      | 41/F     | Hypotension, bradycardia, hypoxia                                                               | Cancer               | Distal common bile duct cancer      | 60/20                 | 1.6            | Theophylline, hydrocortisone                          | Alive   | -              |
| 38       | Andres et al., 2000     | 83/F     | Edema                                                                                           | Cancer               | Follicular non-Hodgkin lymphoma     | -                     | -              | Corticosteroid, chloraminophene                       | Alive   | -              |
| 39       | Benjelloun et al., 2014 | 63/M     | Edema, pleural effusion, ascites, pericarditis                                                  | Cancer               | Waldenstrom disease                 | -                     | 1.2            |                                                       |         | -              |
| 40       | Maubec et al., 2001     | 16/F     | Painful and massive subcutaneous inflammatory edema                                             | Drug (MINE regimen)  | Hodgkin disease                     | -                     | -              |                                                       | Alive   |                |
| 40       | Maubec et al., 2001     | 17/M     | Painful and massive subcutaneous inflammatory edema                                             | Drug (MINE regimen)  | Hodgkin disease                     | -                     | -              |                                                       | Alive   |                |
| 41       | Kobori et al., 2002     | 53/M     | Edema, weight gain, pleural effusion, ascites                                                   | Drug (IL-2)          | Metastatic renal cell carcinoma     | -                     | 2.8            |                                                       | Alive   | -              |
| 41       | Kobori et al., 2002     | 54/M     | Edema, weight gain, pleural effusion, ascites                                                   | Drug (IL-2)          | Metastatic renal cell carcinoma     | -                     | 2.7            |                                                       | Died    | -              |
| 42       | Ozawa et al.,           | 57/F     | Edema, hypovolemic shock,                                                                       | Cancer               | Rectal cancer                       | -                     | 1.5            | Fluid resuscitation, CRRT, theophylline, tulobuterol, | Alive   | -              |



| Ref. No. | Author, year           | Age/ Sex | Presenting symptoms                                                                              | Etiology of SCLS                      | Cancer diagnosis                                    | Blood pressure (mmHg) | Albumin (g/dL) | Treatment                                                                         | Outcome            | Cause of Death |
|----------|------------------------|----------|--------------------------------------------------------------------------------------------------|---------------------------------------|-----------------------------------------------------|-----------------------|----------------|-----------------------------------------------------------------------------------|--------------------|----------------|
|          | 2015                   |          | hypoalbuminemia                                                                                  |                                       |                                                     |                       |                | prednisolone                                                                      |                    |                |
| 43       | Funke et al., 1994     | 19/M     | Edema, weight gain,                                                                              | Cancer                                | Chronic myelogenous leukemia                        | -                     | 3.8            | Furosemide, prednisone, cyclophosphamide                                          | Alive              | -              |
| 44       | Emminger et al., 1990  | 20/M     | Weight gain, pleural effusion, peripheral edema                                                  | Drug (G-CSF)                          | Primitive neuroectodermal tumor                     | -                     | -              | Prednisone, hydration                                                             | Died               | Sepsis         |
| 45       | Ohta et al., 1994      | 7M/M     | Hypovolemic shock, pulmonary edema, pleural effusion, ascites                                    | Drug (IL-2)                           | Hemophagocytic lymphohistiocytosis                  | -                     | -              | High-dose methylprednisolone                                                      | Died               | -              |
| 45       | Ohta et al., 1994      | 2/M      | Acute pulmonary edema                                                                            | Drug (IL-2)                           | Hemophagocytic lymphohistiocytosis                  | -                     | -              | High-dose methylprednisolone                                                      | Alive              | -              |
| 46       | Morino et al., 2003    | 4/F      | Fever, ascites, facial swelling, tachycardia, tachypnea, enlarged cervical LNs, pleural effusion | Cancer                                | Hemophagocytic syndrome                             | 118/46                | 2.7            | Albumin, oral prednisolone, methylprednisolone pulse, cyclosporin A               | Alive              | -              |
| 47       | Gyger et al., 2005     | 48/M     | Dyspnea, lower leg edema, pleural effusions, pericardial effusions                               | GVHD                                  | Multiple myeloma status post APBSCT                 | -                     | -              | Prednisone                                                                        | Alive              | -              |
| 47       | Gyger et al., 2005     | 46/F     | Edema, dyspnea, chest pain, weight gain, pericardial effusion                                    | GVHD                                  | Multiple myeloma status post APBSCT                 | -                     | -              | Prednisone                                                                        | Alive              | -              |
| 48       | Takahashi et al., 1992 | 14/F     | Weight gain, edema, pulmonary edema                                                              | Drug (busulfan, etoposide, nimustine) | Acute lymphoblastic leukemia                        | -                     | -              | IV diuretics, albumin, methylprednisolone                                         | Alive<br>(Relapse) | -              |
| 49       | Singh et al., 2013     | 13/F     | Hypotension, abdominal pain, pleural effusion, ascites, pericardial effusion                     | Cancer                                | Myxofibroma of maxilla<br>suspected Meigs' syndrome | 66/45                 | 2.5            | IV vasopressors, ascites drainage, pericardial effusion drainage, pleural tapping | Alive              | -              |
| 50       | Sculier et. al., 1988  | 58/F     | Weight gain, erythroderma, purpura, diarrhea, oliguria, hypotension,                             | Drug (IL-2)                           | Hypernephroma                                       | 75/-                  | -              | Furosemide, low-dose dopamine (2mcg/kg/min),                                      | Alive              | -              |

| Ref. No. | Author, year          | Age/ Sex | Presenting symptoms                                                                                                                                                                                                                                                                            | Etiology of SCLS                  | Cancer diagnosis                  | Blood pressure (mmHg) | Albumin (g/dL) | Treatment                                                                                                                     | Outcome   | Cause of Death |
|----------|-----------------------|----------|------------------------------------------------------------------------------------------------------------------------------------------------------------------------------------------------------------------------------------------------------------------------------------------------|-----------------------------------|-----------------------------------|-----------------------|----------------|-------------------------------------------------------------------------------------------------------------------------------|-----------|----------------|
|          |                       |          | pulmonary edema                                                                                                                                                                                                                                                                                |                                   |                                   |                       |                | high-dose corticosteroid                                                                                                      | (Relapse) |                |
| 51       | Anderson et al., 2015 | 63/M     | Dyspnea, tachycardia, tachypnea, hypotension, hypoxemia, pulmonary edema, anuria                                                                                                                                                                                                               | Drug (oxaliplatin)                | Colorectal cancer                 | -                     | 2.4            | Corticosteroids (stress dose), vasopressors                                                                                   | Alive     | -              |
| 52       | Liu et al., 2016      | 61/M     | Tachypnea, muscular pain, fullness of the abdomen, edema, flushing                                                                                                                                                                                                                             | Drug (oxaliplatin + capecitabine) | Sigmoid cancer                    | 111/56                | 2.97           | Fluid resuscitation, furosemide, albumin, methylprednisolone, ascites drainage                                                | Alive     |                |
| 53       | Yabe et al., 2010     | 6/M      | Posterior reversible encephalopathy syndrome, mild systemic edema, grade 2 acute graft-versus-host disease of the skin and gastrointestinal tract, consciousness disturbance, tachypnea, tachycardia, massive pleural effusion, ascites, hypotension, negative central venous pressure, anuria | GVHD                              | Fanconi anemia status post APBSCT | +                     | -              | Prednisolone (1mg/kg daily), ulinastatin (10 000 units/kg daily), albumin (0.8 g/kg every other day), IV bevacizumab (5mg/kg) | Alive     | -              |

SCLS: systemic capillary leak syndrome, ALK: Anaplastic lymphoma kinase, CRRT: Continuous renal replacement therapy, G-CSF: Granulocyte colony stimulating factor, GVHD: Graft-versus-host disease, APBSCT: Autologous peripheral blood stem cell transplantation, MINE: mitoguazone, ifosfamide, vinorelbine, etoposide, IV: intravenous, LN; lymph node

## References

1. Pothen L, Rouvière H, Poncin R, Michaux L, Damoiseau P, Lambert M. Systemic capillary leak syndrome revealing a diffuse large B-cell lymphoma. *Acta Clin Belg* 2014;69:305–8.
2. Casadei Gardini A, Aquilina M, et al. Separate episodes of capillary leak syndrome and pulmonary hypertension after adjuvant gemcitabine and three years later after nab-paclitaxel for metastatic disease. *BMC Cancer* 2013;13:542.
3. Zhang F, Yang J, Li Z. Trastuzumab-Induced Systemic Capillary Leak Syndrome in a Breast Cancer Patient. *Pathol Oncol Res* 2014;20:435–7.
4. Lourdes LS, Al-Quran SZ, Dang NH, Markham MJ. Systemic Capillary Leak Syndrome as an Initial Presentation of ALK-Negative

Anaplastic Large Cell Lymphoma. *Case Rep Hematol* 2012;2012:954201.

5. Ahn J, Odom SR, Saillant N, Markham MJ. Capillary leak syndrome and abdominal compartment syndrome from occult rectal malignancy. *Am Surg* 2012;78:443–5.
6. Maroz N, Weiner ID. Secondary capillary leak syndrome related to pemetrexed exposure. *Am J Kidney Dis* 2012;59:582–3.
7. Kai-Feng W, Hong-Ming P, Hai-Zhou L, Li-Rong S, Xi-Yan Z. Interleukin-11-induced capillary leak syndrome in primary hepatic carcinoma patients with thrombocytopenia. *BMC Cancer* 2011;11:204.
8. Bencsath KP, Reu F, Dietz J, Hsi ED, Heresi GA. Idiopathic systemic capillary leak syndrome preceding diagnosis of infiltrating lobular carcinoma of the breast with quiescence during neoadjuvant chemotherapy. *Mayo Clin Proc* 2011;86:260–1.
9. Umemoto T, Watanabe T, Ogose T, et al. Capillary leak syndrome: initial presentation in a patient with ALK+anaplastic large cell lymphoma associated with increased levels of serum cytokines. *Leuk Lymphoma* 2011;52:1139–42.
10. Krzesiński P, Wierzbowski R, Gielerak G, et al. Impedance cardiography in the diagnosis of capillary leak syndrome caused by doxorubicin therapy in a patient with myeloma multiplex. *Cardiol J* 2010;17:88–91.
11. Hsiao SC, Wang MC, Chang H, Pei SN. Recurrent capillary leak syndrome following bortezomib therapy in a patient with relapsed myeloma. *Ann Pharmacother* 2010;44:587–9.
12. Baytan B, Ozdemir O, Gunes AM, Dönmez O. Clofarabine-induced capillary leak syndrome in a child with refractory acute lymphoblastic leukemia. *J Pediatr Hematol Oncol* 2010;32:144–6.
13. Ingegnoli F, Sciascera A, D'Ingianna E, Fantini F. Systemic sclerosis, capillary leak syndrome and nasopharyngeal carcinoma: an unusual association or paraneoplastic manifestations? *Rheumatology (Oxford)* 2009;48:201–2.
14. Zhang W, Wang K, Qian X, et al. Abdominal compartment syndrome associated with capillary leak syndrome after liver transplantation. *Transplant Proc* 2009;41:3927–30.
15. Avarbock AB, Loren AW, Park JY, et al. Lethal vascular leak syndrome after denileukin diftitox administration to a patient with cutaneous gamma/delta T-cell lymphoma and occult cirrhosis. *Am J Hematol* 2008;83:593–5.

16. Baron D, Mayo A, Kluger Y. Gemcitabine-induced chronic systemic capillary leak syndrome: a life-threatening disease. *Clin Oncol (R Coll Radiol)* 2006;18:90–1.
17. Deeren DH, Zachee P, Malbrain ML. Granulocyte colony-stimulating factor-induced capillary leak syndrome confirmed by extravascular lung water measurements. *Ann Hematol* 2005;84:89–94.
18. Biswas S, Nik S, Corrie PG. Severe gemcitabine-induced capillary-leak syndrome mimicking cardiac failure in a patient with advanced pancreatic cancer and high-risk cardiovascular disease. *Clin Oncol (R Coll Radiol)* 2004;16:577–9.
19. Pulkkanen K, Kataja V, Johansson R. Systemic capillary leak syndrome resulting from gemcitabine treatment in renal cell carcinoma: a case report. *J Chemother* 2003;15:287–9.
20. Rechner I, Brito-Babapulle F, Fielden J. Systemic capillary leak syndrome after granulocyte colony-stimulating factor (G-CSF). *Hematol J* 2003;4:54–6.
21. Vigneau C, Haymann JP, Khoury N, Sraer JD, Rondeau E. An unusual evolution of the systemic capillary leak syndrome. *Nephrol Dial Transplant* 2002;17:492–4.
22. De Pas T, Curigliano G, Franceschelli L, Catania C, Spaggiari L, de Braud F. Gemcitabine-induced systemic capillary leak syndrome. *Ann Oncol* 2001;12:1651–2.
23. Meech SJ, McGavran L, Odom LF, et al. Unusual childhood extramedullary hematologic malignancy with natural killer cell properties that contains tropomyosin 4--anaplastic lymphoma kinase gene fusion. *Blood* 2001;98:1209–16.
24. Dagdemir A, Albayrak D, Dilber C, Totan M. G-CSF related capillary leak syndrome in a child with leukemia. *Leuk Lymphoma* 2001;42:1445–7.
25. Ghosh K, Madkaikar M, Iyer Y, Pathare A, Jijina F, Mohanty D. Systemic capillary leak syndrome preceding plasma cell leukaemia. *Acta Haematol* 2001;106:118–21.
26. Railan D, Fivenson DP, Wittenberg G. Capillary leak syndrome in a patient treated with interleukin 2 fusion toxin for cutaneous T-cell lymphoma. *J Am Acad Dermatol* 2000;43:323–4.

27. Jillella AP, Day DS, Severson K, Kallab AM, Burgess R. Non-Hodgkin's lymphoma presenting as anasarca: probably mediated by tumor necrosis factor alpha (TNF-alpha). *Leuk Lymphoma* 2000;38:419–22.
28. Al-Homaidhi A, Prince HM, Al-Zahrani H, Doucette D, Keating A. Granulocyte-macrophage colony-stimulating factor-associated histiocytosis and capillary-leak syndrome following autologous bone marrow transplantation: two case reports and a review of the literature. *Bone Marrow Transplant* 1998;21:209–14.
29. Beermann W, Hörstrup KA, Will R. Systemic capillary leak syndrome. *Am J Med* 1998;105:554.
30. Takimoto Y, Imanaka F, Sasaki N, Nanba K, Kimura N. Gamma/delta T cell lymphoma presenting in the subcutaneous tissue and small intestine in a patient with capillary leak syndrome. *Int J Hematol* 1998;68:183–91.
31. Hiraoka E, Matsushima Y, Inomoto-Naribayashi Y, Nakata H, Nakamura A, Kawanami C. Systemic capillary leak syndrome associated with multiple myeloma of IgG kappa type. *Intern Med* 1995;34:1220–4.
32. Abramov Y, Galun E, Granat M, et al. Postpartum systemic capillary leak syndrome: a possible etiology. *Acta Obstet Gynecol Scand* 1995;74:395–8.
33. Oeda E, Shinohara K, Kamei S, Nomiya J, Inoue H. Capillary leak syndrome likely the result of granulocyte colony-stimulating factor after high-dose chemotherapy. *Intern Med* 1994;33:115–9.
34. Dereure O, Portales P, Clot J, Guilhou JJ. Biclonal Sézary syndrome with capillary leak syndrome. *Dermatology* 1994;188:152–6.
35. Kao NL, Richmond GW, Luskin AT. Systemic capillary leak syndrome. *Chest* 1993;104:1637–8.
36. Ramon D, Betloch I, Jimenez A, Botella R, Castells A, Alberola V. Remission of Sézary's syndrome with cyclosporin A. Mild capillary leak syndrome as an unusual side effect. *Acta Derm Venereol* 1986;66:80–2.
37. Jeong EK, Kim YK, Kim SH, Lee CH, Kim JS. Systemic capillary leak syndrome under general anesthesia: a case report. *Korean J Anesthesiol* 2014;66:462–6.
38. Andres E, Vinzio S, Ruellan A, Herbrecht R, Goichot B, Schlienger JL. Capillary hyperpermeability syndrome of the face. *Presse Med* 2000;29:1279–81.

39. Benjelloun S, Tlam çani I, Yahyaoui G, et al. Idiopathic capillary hyperpermeability syndrome revealing of Waldenström disease. *Ann Biol Clin (Paris)* 2014;72:236–40.
40. Maubec E, Oberlin O, Belhadj K, Roujeau JC. Subcutaneous inflammatory edema induced by MINE chemotherapy. *Ann Dermatol Venereol* 2001;128:534–7.
41. Kobori G, Maegawa M, Ushida H, et al. Two cases of renal cell carcinoma with ascites after interleukin-2 therapy. *Hinyokika Kyo* 2002;48:455–7.
42. Ozawa T, Yamaguchi H, Kiyomatsu T, et al. A case report of idiopathic systemic capillary leak syndrome that occurred during the postoperative period of abdominoperineal resection for colorectal cancer. *Int Surg* 2015;100:58–62.
43. Funke I, Prümmer O, Schrezenmeier H, et al. Capillary leak syndrome associated with elevated IL-2 serum levels after allogeneic bone marrow transplantation. *Ann Hematol* 1994;68:49–52.
44. Emminger W, Emminger-Schmidmeier W, Peters C, et al. Capillary leak syndrome during low dose granulocyte-macrophage colony-stimulating factor (rh GM-CSF) treatment of a patient in a continuous febrile state. *Blut* 1990;61:219–21.
45. Ohta H, Yumara-Yagi K, Sakata N, Inoue M, Kawa-Ha K. Capillary leak syndrome in patients with hemophagocytic lymphohistiocytosis. *Acta Paediatr* 1994;83:1113–4.
46. Morino M, Kumakura R, Miura N, Sasaki N. Decreased hepatic uptake of gallium-67 citrate in haemophagocytic syndrome occurring concomitantly with capillary leak syndrome. *Pediatr Radiol* 2003;33:804–6.
47. Gyger M, Rosenberg A, Shamy A, et al. Vascular leak syndrome and serositis as an unusual manifestation of chronic graft-versus-host disease in nonmyeloablative transplants. *Bone Marrow Transplant* 2005;35:201–3.
48. Takahashi H, Sekiguchi H, Kai S, Ikuta K, Sasaki H, Matsuyama S. Recurrent pulmonary edema in a patient with acute lymphoblastic leukemia after syngeneic bone marrow transplantation. *Rinsho Ketsueki*. 1992;33:354-9.
49. Singh M, Singh S. An unusual case of sudden collapse in the immediate postoperative period in a young healthy female with myxofibroma of the maxilla. *Case Rep Anesthesiol* 2013;596758.

50. Sculier JP, Bron D, Verboven N, Klastersky J. Multiple organ failure during interleukin-2 administration and LAK cells infusion. *Intensive Care Med* 1988;14:666–7.
51. Anderson BJ, Peterson LL. Systemic capillary leak syndrome in a patient receiving adjuvant oxaliplatin for locally advanced colon cancer. *J Oncol Pharm Pract* 2016; 2016;22:725–8.
52. Liu Z, Li de C, Zhu YP. Interleukin-11-induced capillary leak syndrome accompanied with abdominal chylous leakage in primary sigmoid carcinoma patients with thrombocytopenia. *J Cancer Res Ther* 2015;11:1024.
53. Yabe H, Yabe M, Koike T, Shimizu T, Morimoto T, Kato S. Rapid improvement of life-threatening capillary leak syndrome after stem cell transplantation by bevacizumab. *Blood* 2010;115:2723–4.

**Supplementary Table S3. Combination of treatment for cancer patients with systemic capillary leak syndrome**

| Treatment                                                                                              | Total number of patients<br>(n=62) |
|--------------------------------------------------------------------------------------------------------|------------------------------------|
|                                                                                                        | Number of patients (%)             |
| <b>Single kind of therapy</b>                                                                          | <b>18(29.0%)</b>                   |
| Steroids only                                                                                          | 12(19.4%)                          |
| Volume replacement only                                                                                | 4(6.4%)                            |
| Methylxanthine only                                                                                    | 2 (3.2%)                           |
| <b>Two kinds of therapy</b>                                                                            | <b>21(33.9%)</b>                   |
| Steroids + Volume replacement                                                                          | 2(3.2%)                            |
| Steroids + Diuretics                                                                                   | 6(9.7%)                            |
| Steroids + Inotropes                                                                                   | 1 (1.6%)                           |
| Steroids + Methylxanthine                                                                              | 2(3.2%)                            |
| Steroids + Procedure*                                                                                  | 1 (1.6%)                           |
| Steroids + Chemotherapeutic agents‡                                                                    | 2(3.2%)                            |
| Volume replacement + Diuretics                                                                         | 2(3.2%)                            |
| Volume replacement + Inotropes                                                                         | 1 (1.6%)                           |
| Volume replacement + Methylxanthine                                                                    | 1 (1.6%)                           |
| Volume replacement + Immunoglobulin                                                                    | 1 (1.6%)                           |
| Diuretics + Other agents†                                                                              | 1 (1.6%)                           |
| Inotropes + Procedure                                                                                  | 1 (1.6%)                           |
| <b>Three kinds of therapy</b>                                                                          | <b>8(12.9%)</b>                    |
| Steroids + Volume replacement + Diuretics                                                              | 1 (1.6%)                           |
| Steroids + Volume replacement + Inotropes                                                              | 1 (1.6%)                           |
| Steroids + Volume replacement + Chemotherapeutic agents                                                | 1 (1.6%)                           |
| Steroids + Diuretics + Inotropes                                                                       | 1 (1.6%)                           |
| Steroids + Diuretics + Chemotherapeutic agents                                                         | 1 (1.6%)                           |
| Steroids + Immunoglobulin + Chemotherapeutic agents                                                    | 1 (1.6%)                           |
| Volume replacement + Inotropes + Other agents                                                          | 1 (1.6%)                           |
| Diuretics + Methylxanthine + $\beta$ 2 agonists                                                        | 1 (1.6%)                           |
| <b>Four kinds of therapy</b>                                                                           | <b>4(6.5%)</b>                     |
| Steroids + Volume replacement + Diuretics + Other agents                                               | 1 (1.6%)                           |
| Steroids + Volume replacement + Chemotherapeutic agents + Other agents                                 | 1 (1.6%)                           |
| Steroids + Volume replacement + Diuretics + Procedure                                                  | 1 (1.6%)                           |
| Volume replacement + Methylxanthine + $\beta$ 2 agonist + Other agents                                 | 1 (1.6%)                           |
| <b>More than five kinds of therapy</b>                                                                 | <b>2(3.2%)</b>                     |
| Steroids + Volume replacement+ Methylxanthine + $\beta$ 2 agonist+ Procedure                           | 1 (1.6%)                           |
| Steroids + Volume replacement + Methylxanthine + Chemotherapeutic agents<br>+ Other agents + Procedure | 1 (1.6%)                           |
| <b>No information about treatment</b>                                                                  | <b>9(14.5%)</b>                    |

\*Procedure contains dialysis, continuous renal replacement therapy, pericardial/thoracic/ascites drainage or plasma exchange.

†Other agents contain all agents except steroid, diuretics, inotropes, methylxanthine,  $\beta$ 2 agonist, immunoglobulin, and chemotherapeutic agents.

‡ Only contained cases used for the treatment of systemic capillary leak syndrome, not for chemotherapy



**Supplementary Table S4. Comparison of variables in cancer patients with systemic capillary leak syndrome with or without death**

| <b>Valuables</b>                        | <b>Alive (n=43)*</b> | <b>Death (n=16)*</b> | <b>P value</b> |
|-----------------------------------------|----------------------|----------------------|----------------|
| Age (years) ± range                     | 44.5 ±22.8           | 43.3 ±21.6           | 0.853          |
| Sex (M/F)                               | 27/16                | 11/5                 | 0.766          |
| Cause (cancer-itself‡/drugs §)          | 19/21                | 6/9                  | 0.764          |
| Diagnosis (hematologic/non-hematologic) | 28/15                | 10/6                 | 0.073          |
| Follow up duration† (months) ± range    | 8.1 ±9.7             | 13.7 ±23.5           | 0.418          |
| Hypotension vs normal or hypertension)  | 15/26                | 4/12                 | 0.537          |
| SBP (mmHg) ± range                      | 91.4 ±21.4           | 79.3 ±16.2           | 0.389          |
| DBP (mmHg) ± range                      | 52.2 ±21.1           | 47.5 ±3.5            | 0.768          |
| Albumin (g/dL) ± range                  | 2.5 ±0.7             | 2.4 ±0.4             | 0.830          |
| WBC (/μl) ± range                       | 14214 ±13650         | 4150.0 ±5727         | 0.320          |
| Hemoglobin (g/dl) ± range               | 12.2 ±5.5            | 13.5 ±4.8            | 0.611          |
| Hematocrit (%) ± range                  | 44.2 ±11.9           | 67.0 ±0.0            | 0.106          |
| Platelet (/μl) ± range                  | 75563 ±81010         | 46500.0 ±54447       | 0.633          |
| Steroid (use/not use)                   | 27/13                | 10/5                 | 1.000          |

SBP : Systolic blood pressure, DBP: Diastolic blood pressure, WBC: White blood cell count

\*Patient survival was reported in 60 of total 62 case report patients.

†Duration was the follow up months after initial diagnosis of systemic capillary leak syndrome in the articles.

‡Cause of systemic capillary leak syndrome induced only by cancer- itself, not induced by drugs, infection or bone marrow transplantation.

§ Drugs which caused systemic capillary leak syndrome means anti-cancer agents used to treat cancer. See Supplementary Table E4.

**Supplementary Table S5. Cause of death of cancer patients with systemic capillary leak syndrome.**

| <b>Cause of death</b>            | <b>No</b>    |
|----------------------------------|--------------|
| Cancer relapse                   | 2            |
| Cardiac amyloidosis              | 1            |
| Cardiac + hepatic amyloidosis    | 1            |
| Systemic capillary leak syndrome | 4            |
| Sepsis                           | 3            |
| Pneumonia                        | 1            |
| Multiple myeloma                 | 1            |
| <b>Total number</b>              | <b>13/62</b> |

**Supplementary Figure S1 (a)** Kaplan-Meier analysis showing there is no difference in survival rate between systemic capillary leak syndrome patients with death and those without according to sex (1: male, 2: female) ( $p=0.6409$ )

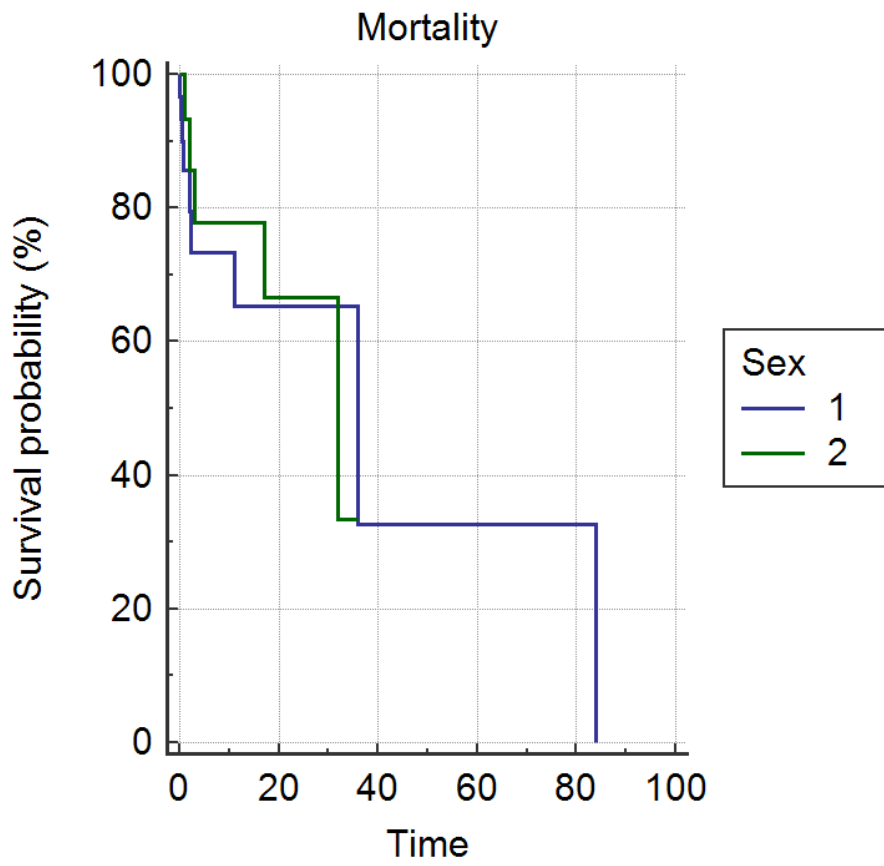

**Supplementary Figure S1(b)** Kaplan-Meier analysis showing there is no difference in survival rate between systemic capillary leak syndrome patients with death and those without according to serum albumin levels (1: < 2.5 vs.2: >2.5 g/dL) ( $p=0.193$ ).

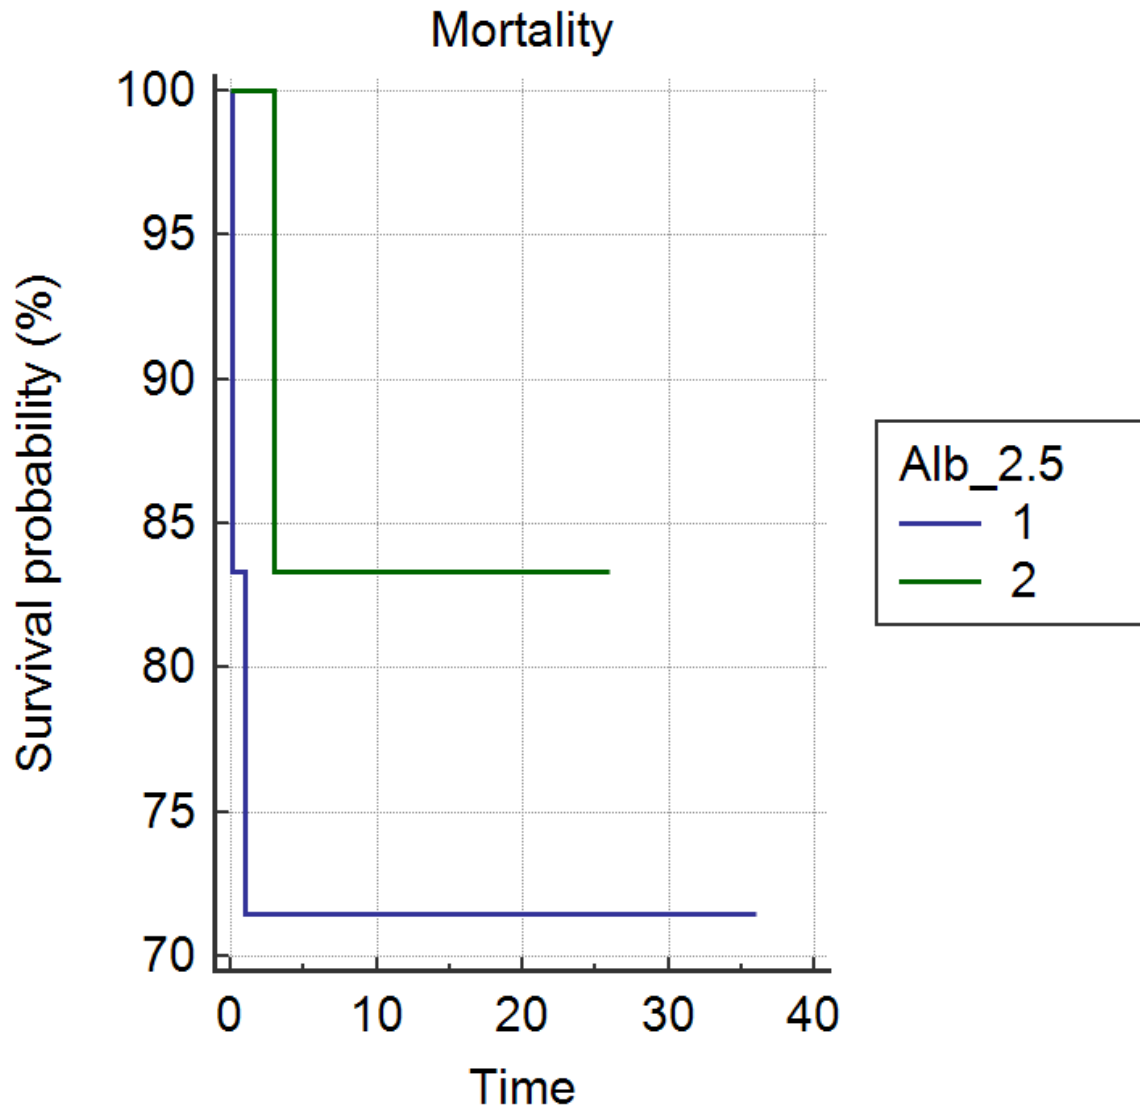

**Supplementary Figure S1(c)** Kaplan-Meier analysis showing there is no difference in survival rate between systemic capillary leak syndrome patients with death and those without according to serum albumin levels (1: < 3.0 vs.2: >3.0 g/dL) ( $p=0.614$ ).

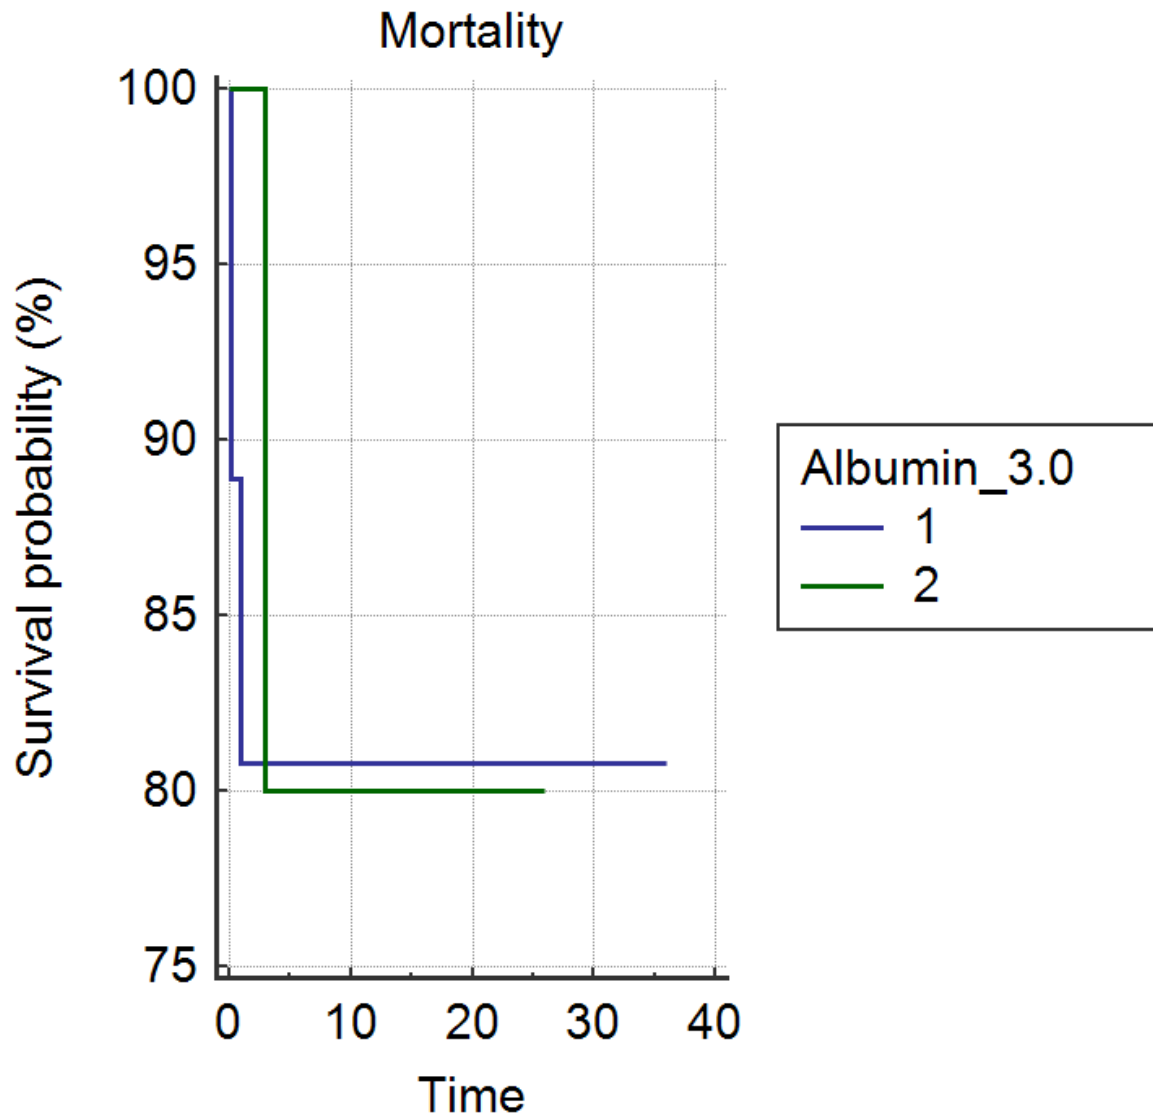

**Supplementary Figure S1(d)** Kaplan-Meier analysis showing there is no difference in survival rate between systemic capillary leak syndrome patients with death and those without according to cause of SCLS (1: cancer itself and 2: drug-associated) ( $p=0.117$ ).

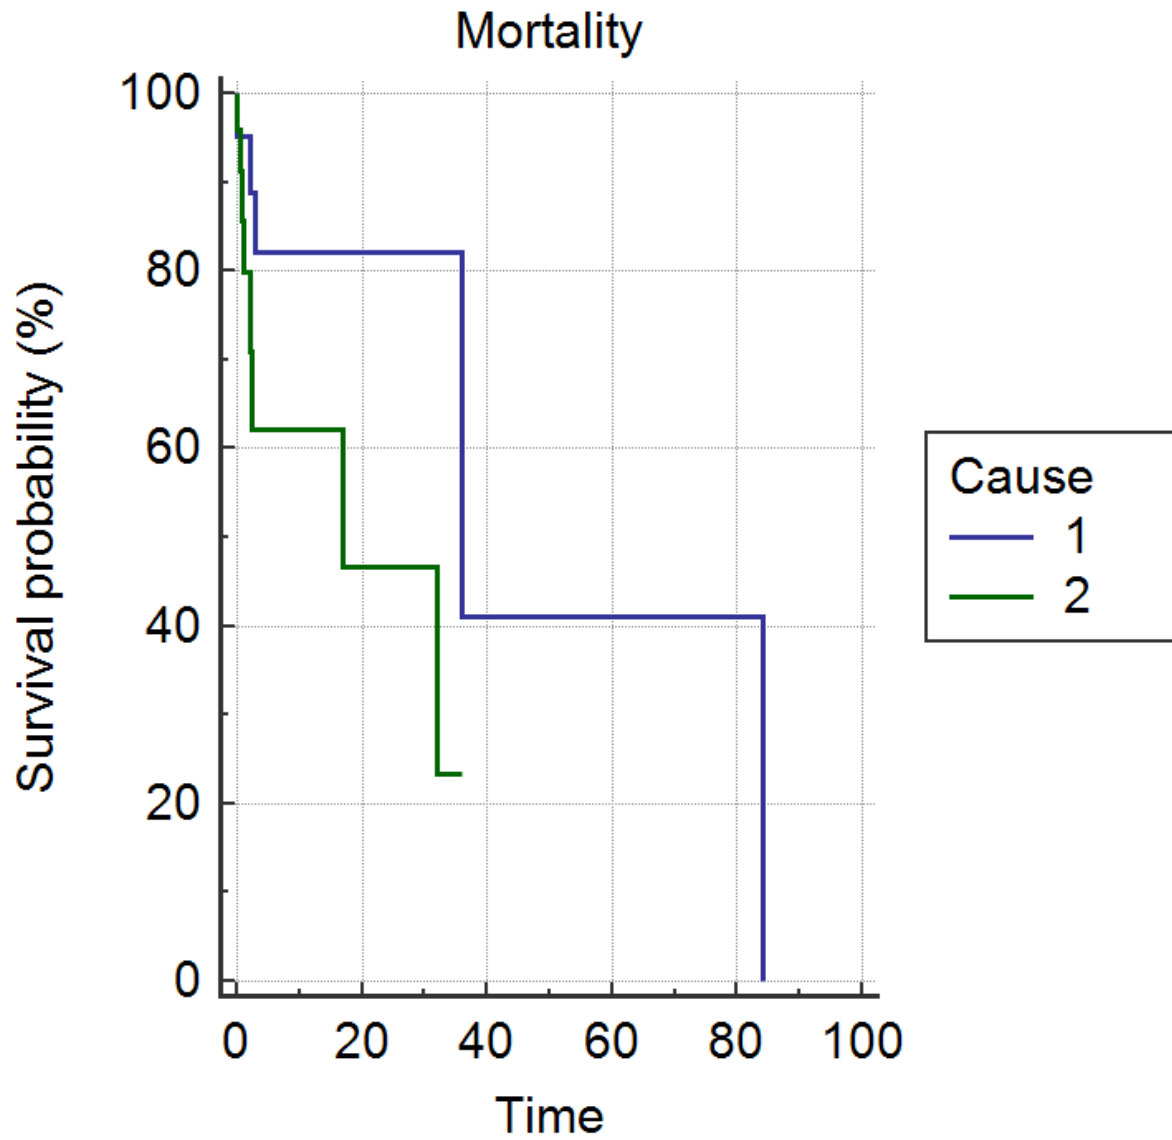

**Supplementary Figure S1(e)** Kaplan-Meier analysis showing there is no difference in survival rate between systemic capillary leak syndrome patients with death and those without according to the presence of hypotension (1: hypotension and 2: no hypotension) ( $p=0.758$ ).

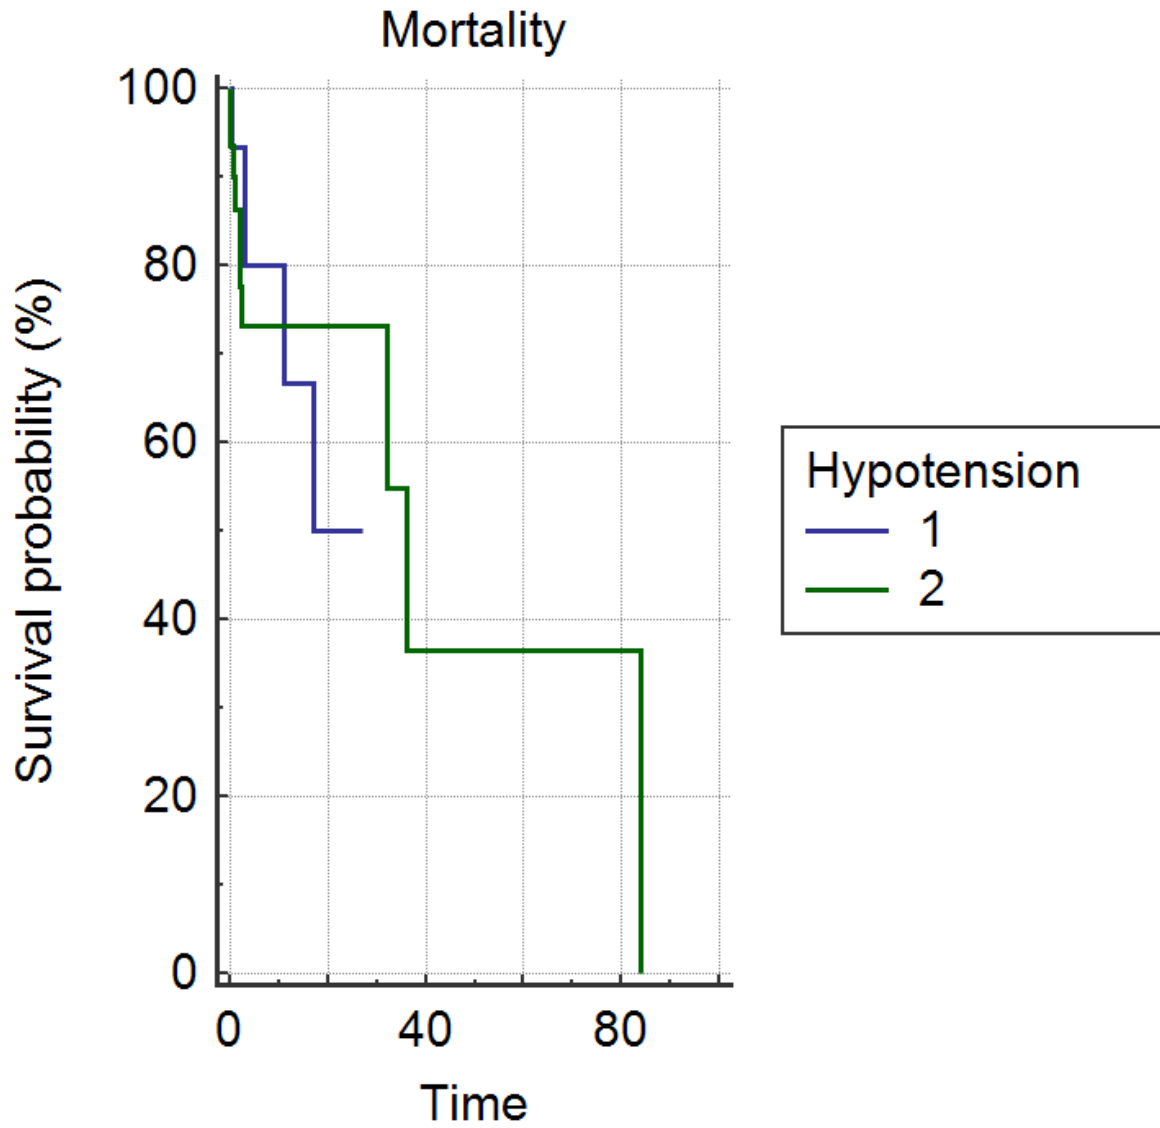

**Supplementary Figure S1(f)** Kaplan-Meier analysis showing there is no difference in survival rate between systemic capillary leak syndrome patients with death and those without according to the presence of leukocytosis (1: white blood cell counts > 15,000 and 2: white blood cell counts < 15,000/mm<sup>3</sup>) (p=0.265).

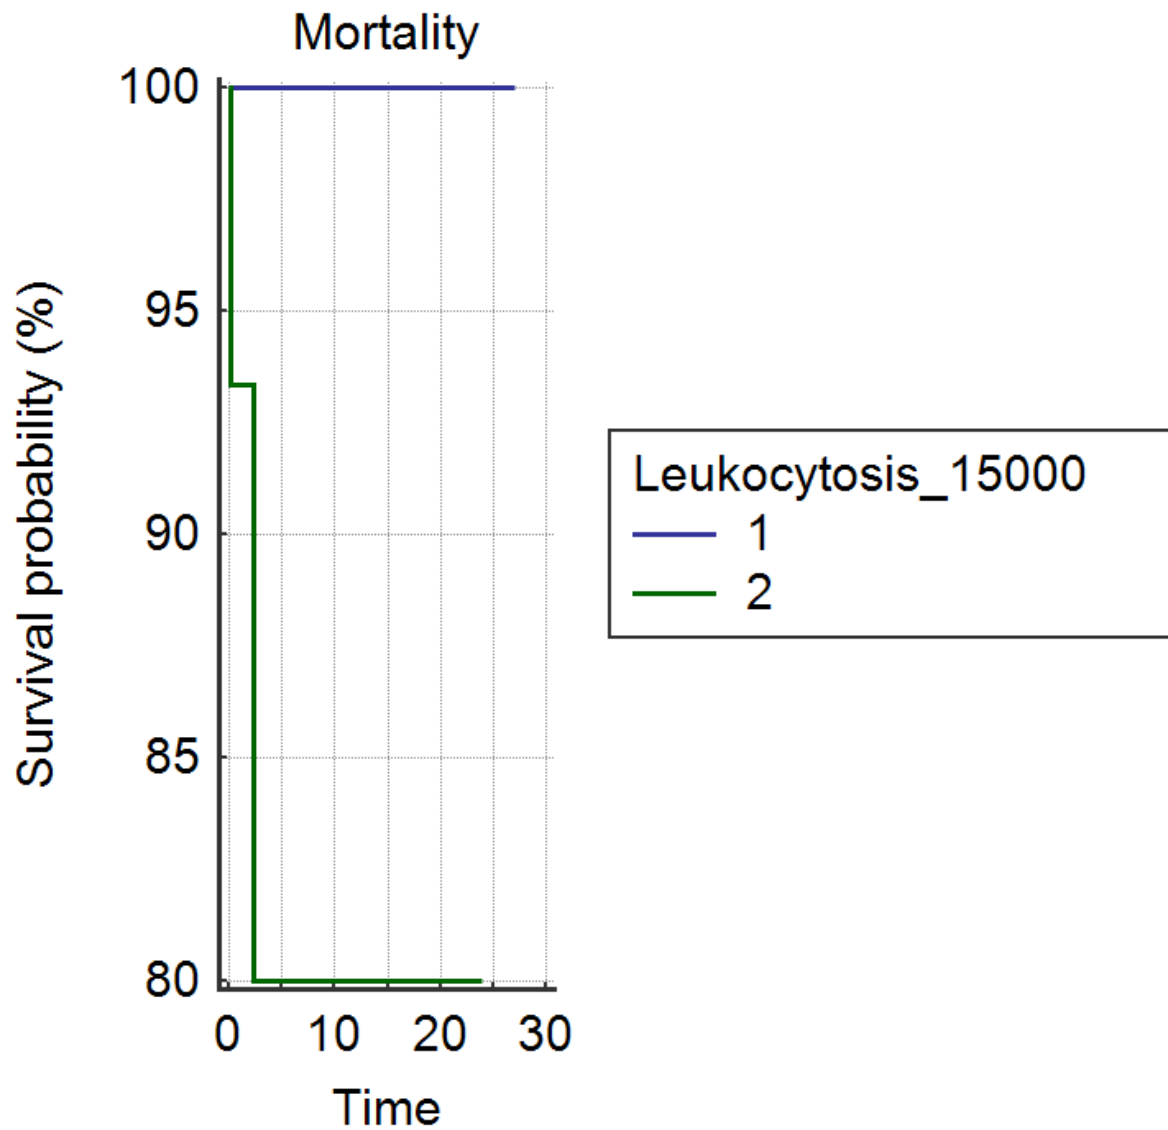



**Supplementary Figure S1(g)** Kaplan-Meier analysis showing there is no difference in survival rate between systemic capillary leak syndrome patients with death and those without according to the use of steroids (1: use of steroids and 2: no use of steroids) ( $p=0.705$ ).

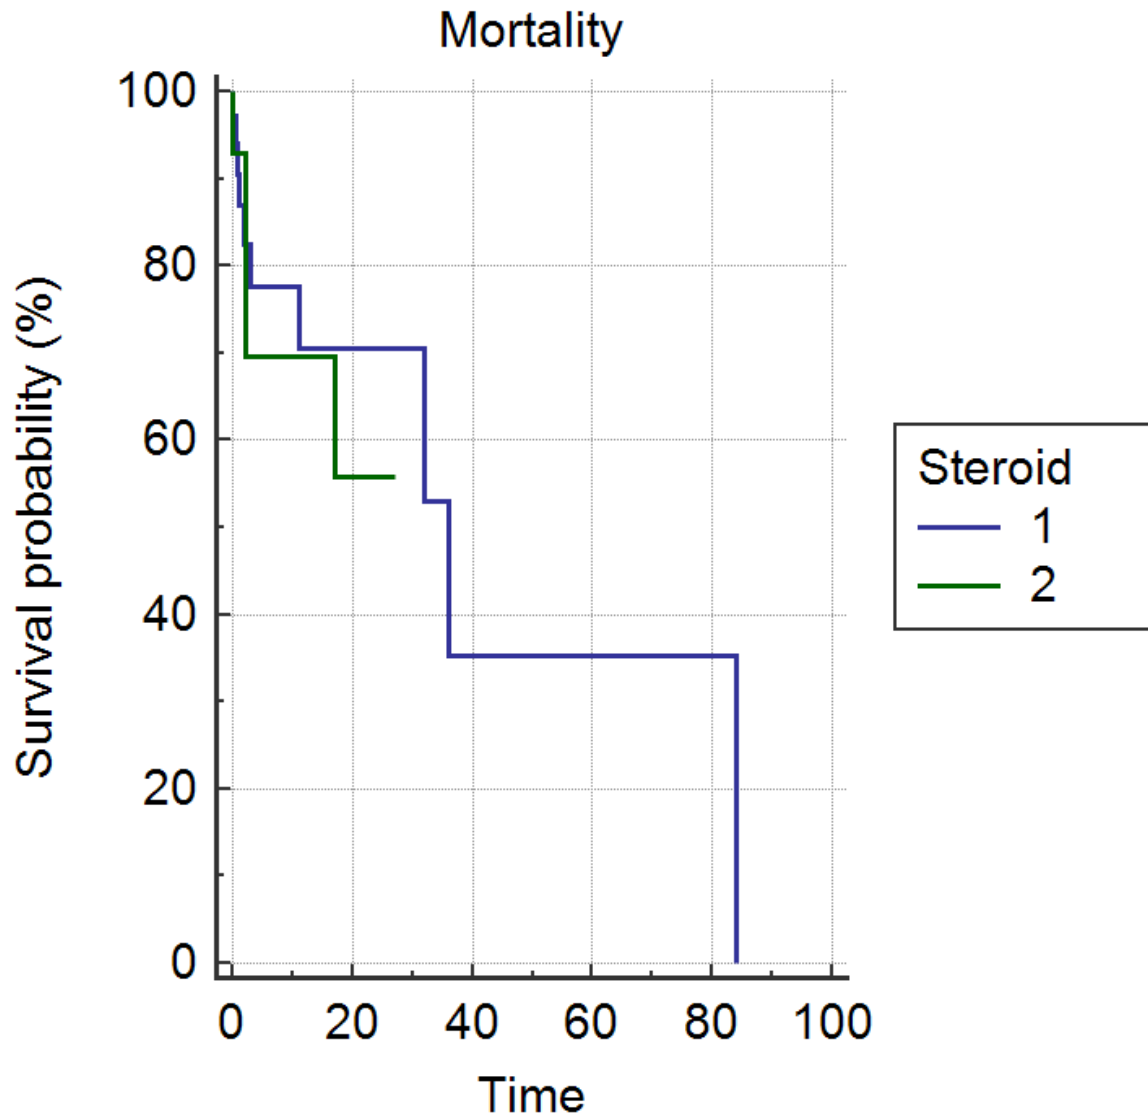

Supplement: jcm-07-00418-s001.pdf [file jcm-07-00418-s001.pdf]
